# Supplementary material for: A near-term iterative forecasting system successfully predicts reservoir hydrodynamics and partitions uncertainty in real time
Source: bioRxiv or medRxiv preprint supplement (doi:10.1101/2020.01.22.915538), 2020-05-28
Supplement: Supplementary file [file media-1.pdf]

1 **Supporting Information**

2 A near-term iterative forecasting system successfully predicts reservoir hydrodynamics and  
3 partitions uncertainty

4

5 R. Quinn Thomas, Renato J. Figueiredo, Vahid Daneshmand, Bethany J. Bookout, Laura K.  
6 Puckett, Cayelan C. Carey

7

8 **Pages:** 19

9 **Text:** 3

10 **Tables:** 3

11 **Figures:** 4

12 **Supporting Information A. Detailed description of the data assimilation methods used in**  
13 **FLARE.**

14 The data assimilation in FLARE used the ensemble Kalman Filter (EnKF) with state  
15 augmentation to calibrate parameters (following the methods of [Zhang *et al.* 2017]). The EnKF  
16 state matrix had  $M$  ensemble members, each with  $K$  model depths (state variables) and  $P$  number  
17 of parameters (an augmentation of the states by including parameters), resulting in an  $M \times (K +$   
18  $P)$  matrix.

19 The EnKF was initialized with a set of  $M$  ensemble members, in which each ensemble  
20 member  $i$  had a vector of modeled water temperatures at  $K$  depths at the  $0$ th time ( $x_0^i$ ) and a  
21 vector of  $P$  parameters ( $\alpha_0^i$ ). For the first day of data assimilation at the beginning of the spin-up  
22 period only, the values of  $x_0^i$  were initialized with observed sensor temperatures and linear  
23 interpolation was used to initialize the modeled depths that did not have observations.

24 For this application,  $P$  was three because three General Lake Model (GLM) parameters  
25 were calibrated for Falling Creek Reservoir: SW\_factor, LW\_factor, zone1temp, and zone2temp.  
26 These parameters were chosen based on a one-step-at-a-time (OAT) global sensitivity analysis of  
27 all GLM parameters [Morris 1991].  $\alpha_0^i$  was initialized using a random draw for each ensemble  
28 from a parameter-specific uniform distribution. For every sequential day in the spin-up  
29 forecasting and forecasting periods, a new vector of parameters for each ensemble member  
30 ( $\alpha_t^{i-}$ ) was created by adding a normal random variable centered at 0 with a specified covariance  
31 ( $\phi$ ) to the previous day's parameter values (eqn. SI.1). The negative sign in the  $\alpha_t^{i-}$  signifies a  
32 parameter vector before updating using assimilated observations, following eqn. SI.1:

33 
$$\alpha_t^{i-} = \alpha_{t-1}^i + MVN(0, \Theta) \quad (\text{eqn. SI.1})$$

34 The covariance ( $\Theta$ ) was constant throughout assimilation and was set to be small but non-zero to  
35 allow the  $P$  parameters to adjust over time and improve the model calibration.

36 Every day, the observed meteorology from the previous 24 hours was pulled from the  
37 GitHub repository and processed to generate a matrix of hourly meteorological inputs for GLM.  
38 This matrix was combined with the other model driver data (inflow rate, mean historical 5-year  
39 inflow water temperature, and mean historical 5-year outflow rate) to create a driver matrix ( $D_t^i$ )  
40 for each ensemble member. The GLM inputs did not differ among the ensembles when  
41 assimilating observations using historical observations.

42 The vector of modeled water temperature for each depth from the previous day ( $x_{t-1}^i$ ),  
43 the parameter vector ( $\alpha_t^{i-}$ ), and the last 24 hours of driver data ( $D_t^i$ ) were used to initialize and  
44 run a 1-day simulation of the GLM for each ensemble member,  $G(x_{t-1}^i, \alpha_t^{i-}, D_t^i)$ . Process  
45 uncertainty was added to the water temperature predictions from the GLM following eqn. SI.2 to  
46 create predictions of water temperature with process uncertainty for each depth:

$$47 \quad x_t^{i-} = G(x_{t-1}^i, \alpha_t^{i-}, D_t^i) + MVN(0, \Sigma_t) \text{ (eqn. SI.2)}$$

48 where  $x_t^{i-}$  is the  $K \times 1$  vector of predicted water temperatures at the modeled depths for the  $i$ th  
49 ensemble member at time  $t$ .  $MVN(0, \Sigma_t)$  is a random draw from a multivariate normal  
50 distribution with a mean of 0 and the covariance matrix at time  $t$  ( $\Sigma_t$ ).

51 The  $\Sigma_t$  matrix evolved through data assimilation, as the model predictions prior to  
52 updating ( $x_t^{i-}$ ) improved or degraded over time. This allowed for the process uncertainty to  
53 reflect the performance of model predictions over a specified time period (a 30-day window in  
54 our application for Falling Creek Reservoir). The first 30 days of assimilation used to generate  
55 the  $\Sigma_t$  matrix so that the  $\Sigma_t$  during that period did not evolve and was a diagonal matrix with a  
56 constant variance for all depths (0.5 °C). After the first 30 days, a 30-day running covariance

57 matrix at the observed depths ( $\Sigma_t^*$ ) was calculated as the residual of the predictions prior to  
 58 updating, following eqn. SI.3:

$$59 \quad \Sigma_t^* = \frac{1}{V} \sum_{l=t}^V (\bar{x}_{t-l} - y_{t-l})(\bar{x}_{t-l} - y_{t-l}) \text{ (eqn. SI.3)}$$

60  $\Sigma_t^*$  was used to calculate  $\Sigma_t$  by linearly interpolating the variances and covariances between  
 61 depths in  $\Sigma_t^*$ . In eqn. SI.3,  $V$  is the number of previous days included in the covariance matrix  
 62 (here, 30).

63 If data were not available to update the model states due to missing sensor data, the states  
 64 were not updated and  $x_t^i = x_t^{i-}$ . Otherwise, we calculated the covariance among states in the  
 65 ensemble members ( $C_{xx}$ ) using eqn. SI.4:

$$66 \quad C_{xx} = \frac{1}{M-1} \sum_{i=1}^M (x_t^{i-} - \bar{x}_t)(x_t^{i-} - \bar{x}_t) \text{ (eqn. SI.4)}$$

67 where  $\bar{x}_t$  was the mean temperature at each modeled depth across ensemble members. The  $C_{xx}$   
 68 matrix represents the estimated model error. Similarly, we calculated the covariance among  
 69 parameters and states in the ensemble members ( $C_{\alpha x}$ ) to estimate the relationship between  
 70 parameters and model predictions using eqn. SI.5:

$$71 \quad C_{\alpha x} = \frac{1}{M-1} \sum_{i=1}^M (\alpha_t^{i-} - \bar{\alpha}_t)(x_t^{i-} - \bar{x}_t) \text{ (eqn. SI.5)}$$

72 where  $\bar{\alpha}_t$  was the mean across ensemble members for each parameter in the parameter vector.

73 Next, to quantify uncertainty in the observations, we added normally-distributed noise to  
 74 the vector of observations at time  $t$  ( $y_t$ ) using the observation covariance matrix ( $\mathbf{R}$ ) (eqn. SI.6):

$$75 \quad \hat{y}_t^i = y_t + MVN(0, \mathbf{R}) \text{ (eqn. SI.6)}$$

76 where  $\hat{y}_t^i$  is the vector of observations with uncertainty added. In our application, the  
 77 observational uncertainty was equal for all depths and not correlated among depths, and thus the  
 78  $\mathbf{R}$  matrix was diagonal.

79 The model states (water temperatures at specific depths) and parameter updating using  
 80 the observations first required calculating the Kalman gain for the states ( $\mathbf{K}_x$ ) and parameters  
 81 ( $\mathbf{K}_\alpha$ ) following eqn. SI.7:

$$82 \quad \begin{bmatrix} \mathbf{K}_x \\ \mathbf{K}_\alpha \end{bmatrix} = \begin{bmatrix} \mathbf{C}_{xx}\mathbf{H}^T(\mathbf{H}\mathbf{C}_{xx}\mathbf{H}^T + \mathbf{R})^{-1} \\ \mathbf{C}_{\alpha x}\mathbf{H}^T(\mathbf{H}\mathbf{C}_{xx}\mathbf{H}^T + \mathbf{R})^{-1} \end{bmatrix} \text{ (eqn. SI.7)}$$

83 where  $\mathbf{H}$  is a matrix in which each row corresponds to a depth with an observation and each  
 84 column represents each of the modeled depths. The column that matched the depth of the  
 85 particular row's observation had a value of 1 while all other columns had a value of 0. Each row  
 86 only had a single 1.  $T$  represents the transpose of the  $\mathbf{H}$  matrix.

87 The Kalman gain represented the proportional adjustment of the GLM model output  
 88 based on the difference between the model predictions of water temperature and the sensor  
 89 observations. A Kalman gain value of 1 is associated with a full adjustment of the model state to  
 90 match an observation (likely due to low or near-zero observational uncertainty;  $\mathbf{R}$ ), while a value  
 91 of zero has no adjustment of the modeled state. The full matrix of the Kalman gain included the  
 92 direct updating of water temperature at a particular depth based on the comparison to sensor  
 93 observations at that depth and on the covariance of model states across depths (i.e., a large  
 94 update in one depth influenced the update of another depth if there was high correlation between  
 95 those two specific depths). This allowed the Kalman gain to update depths without sensor  
 96 observations because they were correlated with observed depths in the model predictions in  $\mathbf{C}_{xx}$ .

97 Finally, the corrupted states and parameters were updated by adding the state gain

98  $\mathbf{K}_x(\hat{y}_t^i - \mathbf{H}x_t^{i-})$  and parameter gain  $\mathbf{K}_\alpha(\hat{y}_t^i - \mathbf{H}x_t^{i-})$ , using eqn. SI.8:

$$99 \quad \begin{bmatrix} x_t^i \\ \alpha_t^i \end{bmatrix} = \begin{bmatrix} x_t^{i-} \\ \alpha_t^{i-} \end{bmatrix} + \begin{bmatrix} \mathbf{K}_x(\hat{y}_t^i - \mathbf{H}x_t^{i-}) \\ \mathbf{K}_\alpha(\hat{y}_t^i - \mathbf{H}x_t^{i-}) \end{bmatrix} \text{ (eqn. SI.8)}$$

100 The Kalman gain thus updated the model states for which there were corresponding observations  
101 and updated the model states that did not have corresponding observations based on the  
102 correlation between the observed and unobserved states. Similarly, the parameters were updated  
103 based on their correlation with the observed states.

104

## 105 **References**

106 Morris, M.D. (1991), Factorial Sampling Plans for Preliminary Computational Experiments.  
107 Technometrics 33(2), 161-174, <https://doi.org/10.1080/00401706.1991.10484804>

108 Zhang, H., Hendricks Franssen, H.-J., Han, X., Vrugt, J.A. and Vereecken, H. (2017), State and  
109 parameter estimation of two land surface models using the ensemble Kalman filter and the  
110 particle filter. Hydrol. Earth Syst. Sci. 21(9), 4927-4958, [https://doi.org/10.5194/hess-21-4927-](https://doi.org/10.5194/hess-21-4927-2017)  
111 [2017](https://doi.org/10.5194/hess-21-4927-2017)

112

113 **Supporting Information B. Description of how the NOAA GEFS forecasts were spatially**  
114 **and temporally-downscaled.**

115 The overarching goal of the spatial and temporal downscaling was to adjust the  $1 \times 1^\circ$   
116 spatial resolution and 6-hour temporal resolution NOAA GEFS forecasts to represent the  
117 reservoir's local meteorological conditions at a 1-hour temporal resolution.

118 First, we used historical GEFS forecasts and 1-minute scale observational data measured  
119 at the reservoir from 6 April – 6 December 2018 as the “training data” for the spatial  
120 downscaling [Carey *et al.* 2019]. We aggregated both the NOAA GEFS and the observed  
121 meteorology to the daily scale by averaging all observations (except for precipitation, which was  
122 summed) and matched the data by date. In this training dataset, we only used the first day of each  
123 historical 16-day NOAA GEFS forecast because it contained the lowest spread among NOAA  
124 GEFS ensemble members and was mostly likely to represent any consistent offsets between the  
125  $1 \times 1^\circ$  forecast and the local conditions.

126 To spatially-downscale temperature, relative humidity, wind speed, shortwave radiation,  
127 and longwave radiation, we estimated the linear relationship between the daily observation and  
128 forecast data in the training dataset (Supporting Information Table 2). We then applied this linear  
129 model to each day of the 16-day forecast. We set downscaled values for each variable that was  
130 less than zero to zero and values of relative humidity greater than 100 to 100. This resulted in a  
131 spatially-downscaled NOAA GEFS forecast product at the daily time scale.

132 To temporally-downscale the spatially-downscaled temperature, relative humidity, and  
133 wind speed forecasts from the daily to 1-hour resolution, we first used the difference between the  
134 pre-spatially downscaled NOAA GEFS 6-hour forecast and its daily mean to convert the daily  
135 spatially-downscaled forecast to its original 6-hour resolution. We used a monotone Hermite

136 spline method to obtain hourly values from the 6-hour values. Before applying the spline method  
137 within the first 6-hour period, we used the observed meteorology as the 0-hour variable and the  
138 downscaled forecast as the 6-hour value. This allowed for a smooth transition between the  
139 observed meteorology used in data assimilation and the downscaled forecast.

140 To temporally-downscale shortwave radiation from the spatially-downscaled daily  
141 resolution to 1-hour resolution, we calculated the potential top-of-atmosphere solar radiation for  
142 each hour to determine a scaling factor between hourly shortwave radiation and the mean daily  
143 potential shortwave radiation [following the `solar_geom.R` function in *Dietze 2017*]. We used  
144 this ratio to convert the daily downscaled shortwave radiation to the 1-hour resolution.

145 To temporally-downscale longwave radiation from the spatially-downscaled daily  
146 resolution to 1-hour resolution, we first used the relative difference between the pre-spatially  
147 downscaled NOAA GEFS 6-hour forecast and its daily mean to convert the daily spatially-  
148 downscaled forecast to its original 6-hour resolution. We then applied the 6-hour mean value to  
149 each hour within that time window.

150 Precipitation was only spatially-downscaled. We first calculated the ratio of the  
151 forecasted precipitation to observed precipitation in the training data. Then, we multiplied each  
152 NOAA GEFS 6-hourly forecasts of precipitation by this ratio.

153 Finally, we represented uncertainty in the spatial and temporal-downscaling process by  
154 adding random noise to each downscaled 1-hour forecast. To add the random noise, we first  
155 applied the spatial and temporal downscaling process described above to the NOAA GEFS  
156 forecast used in the training data. Second, we calculated the residuals between the observed  
157 meteorology and the downscaled NOAA GEFS forecast at the 1-hour resolution for temperature,  
158 relative humidity, wind speed, shortwave radiation, and longwave radiation. This resulted in a set



159 of residuals for each variable (except precipitation) within each hour. Third, we used the  
160 residuals to determine the covariance of residuals among variables across all hours in the training  
161 dataset (Supporting Information Table 3). Finally, to add noise to each hour of a 16-day forecast,  
162 we used this covariance to draw values for each variable from a multivariate normal distribution  
163 that was centered at the downscaled values. By using the multivariate normal distribution, the  
164 added noise reflects the downscaling uncertainty that is not independent among variables. In  
165 total, we generated 21 random draws from the downscaling uncertainty for each of the 21  
166 downscaled NOAA GEFS ensembles.

167

## 168 **References**

169 Carey, C.C., Bookout, B.J., Lofton, M.E. and McClure, R.P. (2019), Time series of high-  
170 frequency meteorological data at Falling Creek Reservoir, Virginia, USA 2015-2018.,  
171 Environmental Data Initiative,  
172 <https://doi.org/10.6073/pasta/68de79f732a9f3d2a686dda2eeb8197d>

173 Dietze, M.C. (2017), Prediction in ecology: a first-principles framework. *Ecol Appl* 112(1),  
174 6252-6213, <https://doi.org/10.1002/eap.1589>

175

176 **Supporting Information C: A description of the sensor array at the reservoir and wireless**  
177 **data transmission methods.**

178 We measured the water temperature profile in Falling Creek Reservoir on 1-m intervals  
179 from the surface (0.1 m depth) to just above the sediments at 9 m at the deepest site of the  
180 reservoir with NexSens T-Node FR thermistors (NexSens Technology, Inc.; Fairborn, Ohio,  
181 USA; [Carey et al. 2019b]). Thus, we had sensor observations for 0.1 m, 1 m, 2 m, 3 m, 4 m, 5 m,  
182 6 m, 7 m, 8 m, and 9 m. The thermistor string was factory-calibrated and verified against a  
183 NIST-traceable thermistor to meet measurement accuracy of  $\pm 0.075^\circ\text{C}$ . A Campbell Scientific  
184 (Logan, Utah, USA) research-grade meteorological station deployed on the dam of the reservoir  
185 measured shortwave radiation, longwave radiation, air temperature, relative humidity, rainfall,  
186 wind speed, and barometric pressure [Carey et al. 2019a]. These meteorological variables were  
187 measured every minute and then downsampled (temperature, wind speed, humidity), averaged  
188 (shortwave and longwave), or summed (precipitation) to the hourly scale to serve as driver data  
189 for the GLM model (Supporting Information Table 1).

190 The water temperature and meteorological sensor data were staged on Campbell  
191 Scientific data loggers on-site as measurements were retrieved, and transmitted daily to cloud  
192 storage. The sensor gateway attached to the Campbell Scientific data loggers ran the Ubuntu  
193 Linux software distribution, as well as software applications and scripts that were developed to  
194 perform data transfer and management functions including: 1) retrieve data from the logger using  
195 Campbell Scientific interfaces, 2) check cellular modem connectivity and reset modules as  
196 needed; and 3) reliably upload sensor data updates to appropriate repositories on cloud storage  
197 using the git client. Data were structured as a time series, with measurements appended as lines  
198 to a comma-separated values (CSV) file. Data transfers used Git (<https://git-scm.com>), an open-

199 source distributed version control system, for efficient and reliable updates with minimum  
200 bandwidth usage, such that only the data collected since the last successful transfer were sent  
201 from the gateway to the cloud server. The gateway also ran a virtual private network (VPN)  
202 open-source software, IPOP (IP-over-P2P) to provide authentication and encryption [*Ganguly et*  
203 *al. 2006*], thereby providing a secure data transfer.

204 We measured the inflow discharge rate of the primary tributary entering into FCR  
205 through a weir with an INW Aquistar PT2X pressure sensor (INW, Kirkland, Washington,  
206 USA), which recorded the water temperature and water level [*Carey et al. 2018*]. We used the  
207 water level to calculate the mean daily discharge rate following [*Gerling et al. 2014*] and set the  
208 outflow discharge rate to the inflow discharge rate as the reservoir was maintained at a constant  
209 water level through the study.. Because we were unable to wirelessly connect the weir sensor to  
210 the cloud to transmit the inflow discharge data in real-time, we averaged the previous five years'  
211 data measured on a given day to serve as driver data for forecasting.

212

## 213 **References**

214 Carey, C.C., Bookout, B.J., Lofton, M.E. and McClure, R.P. (2019a), Time series of high-  
215 frequency meteorological data at Falling Creek Reservoir, Virginia, USA 2015-2018.,  
216 Environmental Data Initiative,  
217 <https://doi.org/10.6073/pasta/68de79f732a9f3d2a686dda2eeb8197d>

218 Carey, C.C., Bookout, B.J. and Woelmer, W.M. (2019b), Time series of high-frequency sensor  
219 data measuring water temperature, dissolved oxygen, conductivity, specific conductivity, total  
220 dissolved solids, chlorophyll a, phycocyanin, and fluorescent dissolved organic matter at discrete

221 depths in Falling Creek Reservoir, Virginia, USA in 2018, Environmental Data Initiative,

222 <https://doi.org/10.6073/pasta/128777b056a4b2bfba99ff8e780e2d59>

223 Carey, C.C., Gerling, A.B., McClure, R.P., Lofton, M.E. and Bookout, B.J. (2018), Discharge

224 time series for the primary inflow tributary entering Falling Creek Reservoir, Vinton, Virginia,

225 USA 2013-2018., Environmental Data Initiative,

226 <https://doi.org/10.6073/pasta/64ff214b987da2997f5c823b156b3334>

227 Ganguly, A., Agrawal, A., Boykin, P.O. and Figueiredo, R. (Year), IP over P2P: enabling self-

228 configuring virtual IP networks for grid computing. Proceedings 20th IEEE International Parallel

229 & Distributed Processing Symposium. 10.1109/IPDPS.2006.1639287

230 Gerling, A.B., Browne, R.G., Gantzer, P.A., Mobley, M.H., Little, J.C. and Carey, C.C. (2014),

231 First report of the successful operation of a side stream supersaturation hypolimnetic

232 oxygenation system in a eutrophic, shallow reservoir. Water Res 67, 129-143,

233 <https://doi.org/10.1016/j.watres.2014.09.002>

234

235 **Supporting Information Table 1.** Meteorological sensors deployed on the dam at the Falling  
 236 Creek Reservoir as part of a research-grade Campbell Scientific weather station that collected  
 237 driver data for the General Lake Model.

| Sensors deployed at the reservoir                                                                                       | Meteorological variables measured         | Measurement precision           |
|-------------------------------------------------------------------------------------------------------------------------|-------------------------------------------|---------------------------------|
| Rotronic Hydroclip2 HC2S3-L<br>Temperature and Relative Humidity Probe with RM Young<br>10 plate Solar Radiation Shield | Air Temperature at 2 m                    | -50 - 100°C ± 0.1               |
|                                                                                                                         | Relative Humidity at 2 m                  | 0 - 100% ± 1.3                  |
| RM Young 05103-L Wind Monitor                                                                                           | Wind Speed at 4 m                         | 0 - 100 m/s ± 0.3               |
| Hukseflux NR01 4-component Net Radiometer                                                                               | Surface Downward Shortwave Radiation Flux | 0 - 2000 W/m <sup>2</sup> ± 10% |
|                                                                                                                         | Surface Downward Longwave Radiation Flux  | 0 - 1000 W/m <sup>2</sup> ± 10% |

238

239

240 **Supporting Information Table 2.** The slope, intercept, and  $R^2$  for the relationship between the  
241 first day of each NOAA GEFS forecast for the grid cell that contains Falling Creek Reservoir  
242 and the observed meteorology from the on-site weather station, as described in Supporting  
243 Information B.

|                     | Slope | Intercept | $R^2$ |
|---------------------|-------|-----------|-------|
| Air temperature     | 0.97  | 10.3      | 0.95  |
| Relative humidity   | 1.0   | -1.4      | 0.55  |
| Wind speed          | 0.53  | 0.68      | 0.46  |
| Shortwave radiation | 0.77  | 7.40      | 0.81  |
| Longwave radiation  | 0.96  | 43.5      | 0.94  |

244

245

246 **Supporting Information Table 3.** Covariance matrix describing the relationships among  
 247 residuals from the observed meteorology and downscaled NOAA GEFS forecasts (see  
 248 Supporting Information B).

|                     | Air temperature | Wind speed | Relative humidity | Shortwave radiation | Longwave radiation | Rain |
|---------------------|-----------------|------------|-------------------|---------------------|--------------------|------|
| Air temperature     | 2.26            | 0.05       | -5.12             | 17.64               | -0.11              | 0    |
| Wind speed          | 0.05            | 0.26       | -0.54             | 3.45                | -1.98              | 0    |
| Relative humidity   | -5.12           | -0.54      | 80.26             | -75.29              | 16.29              | 0    |
| Shortwave radiation | 17.64           | 3.45       | -75.29            | 1361.29             | -231.28            | 0    |
| Longwave radiation  | -0.11           | -1.98      | 16.29             | -231.28             | 147.29             | 0    |
| Rain                | 0               | 0          | 0                 | 0                   | 0                  | 0    |

249

250 **Supporting Information Figure 1.** Values for the three calibrated parameters: a) shortwave  
251 factor, b) mean zone 1 sediment temperature, and c) mean zone 2 sediment temperature from  
252 each ensemble member during the combined spin-up and forecasting periods of the study.

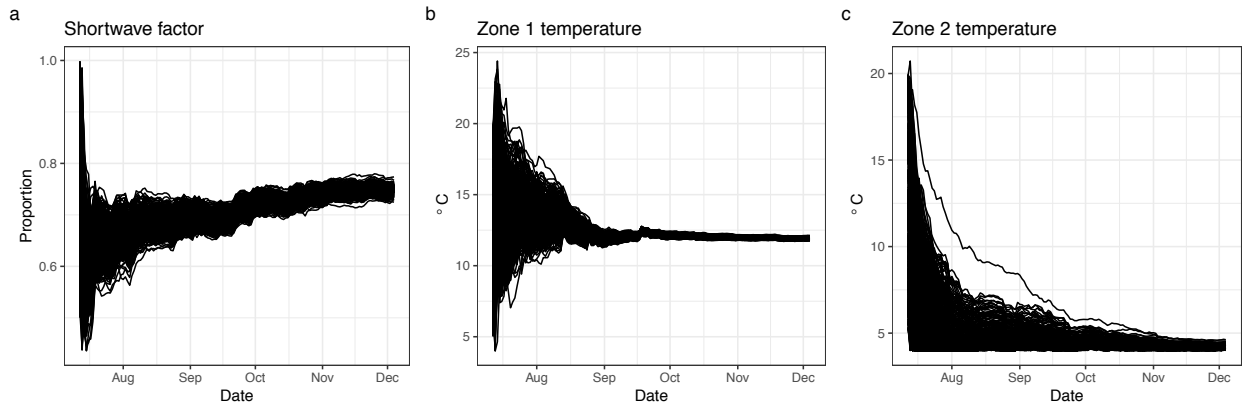

253



254 **Supporting Information Figure 2.** The relative contributions of the individual sources of  
 255 uncertainty (left axis) to the total forecast uncertainty (right axis, orange line) varies through the  
 256 16-day forecast horizon. This forecast was initialized on 1 September 2018 and is one of three  
 257 16-day forecasts (with Supporting Information Figure 3 and Supporting Information Figure 4)  
 258 that were averaged to create Figure 6. Two depths are shown (0.1 m – a, b; 8.0 m – c, d) and the  
 259 relative contributions of initial condition uncertainty without (left) and with (right) gaps in water  
 260 temperature sensor observations are shown in the two columns.

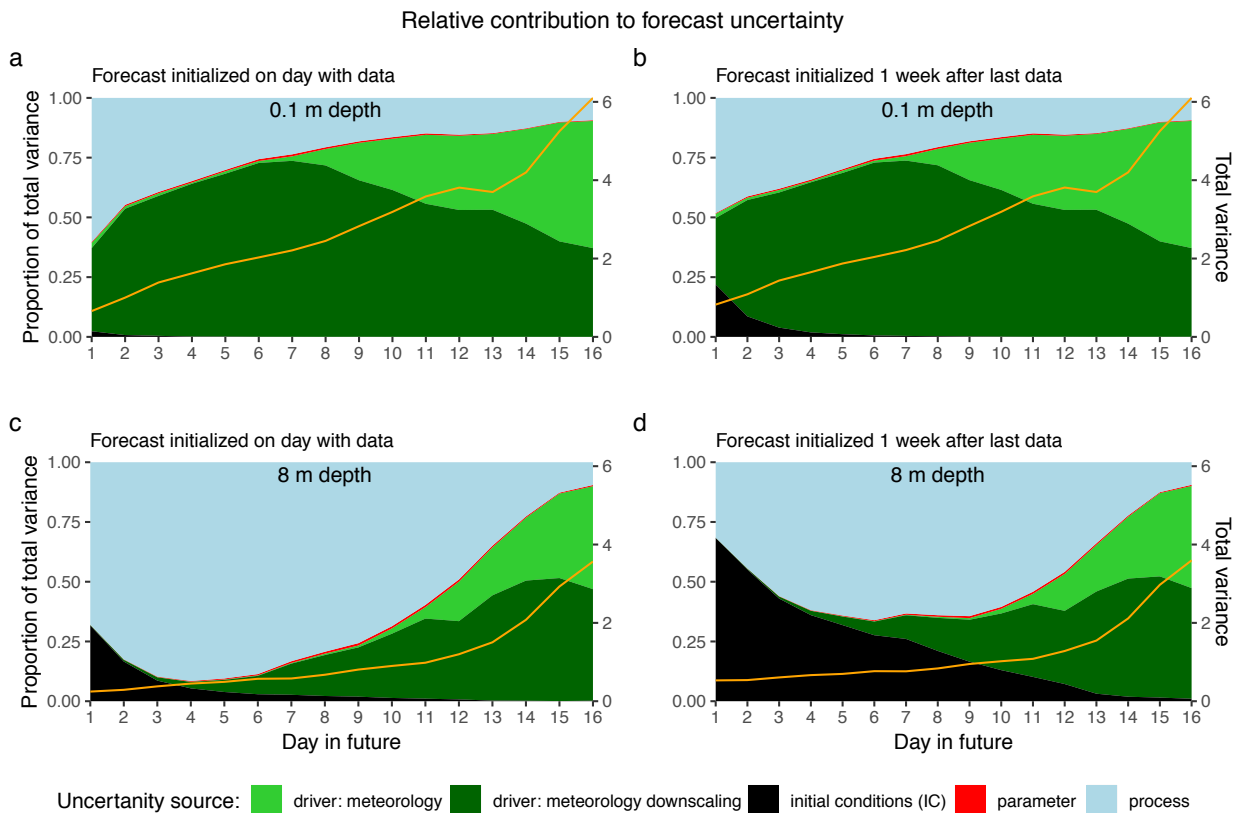

261

262 **Supporting Information Figure 3.** The relative contributions of the individual sources of  
 263 uncertainty (left axis) to the total forecast uncertainty (right axis, orange line) varies through the  
 264 16-day forecast horizon. This forecast was initialized on 18 October 2018, three days prior to  
 265 turnover, and is one of three 16-day forecasts (with Supporting Information Figure 2 and  
 266 Supporting Information Figure 4) that were averaged to create Figure 6. Two depths are shown  
 267 (0.1 m – a, b; 8.0 m – c, d) and the relative contributions of initial condition uncertainty without  
 268 (left) and with (right) gaps in water temperature sensor observations are shown in the two  
 269 columns.

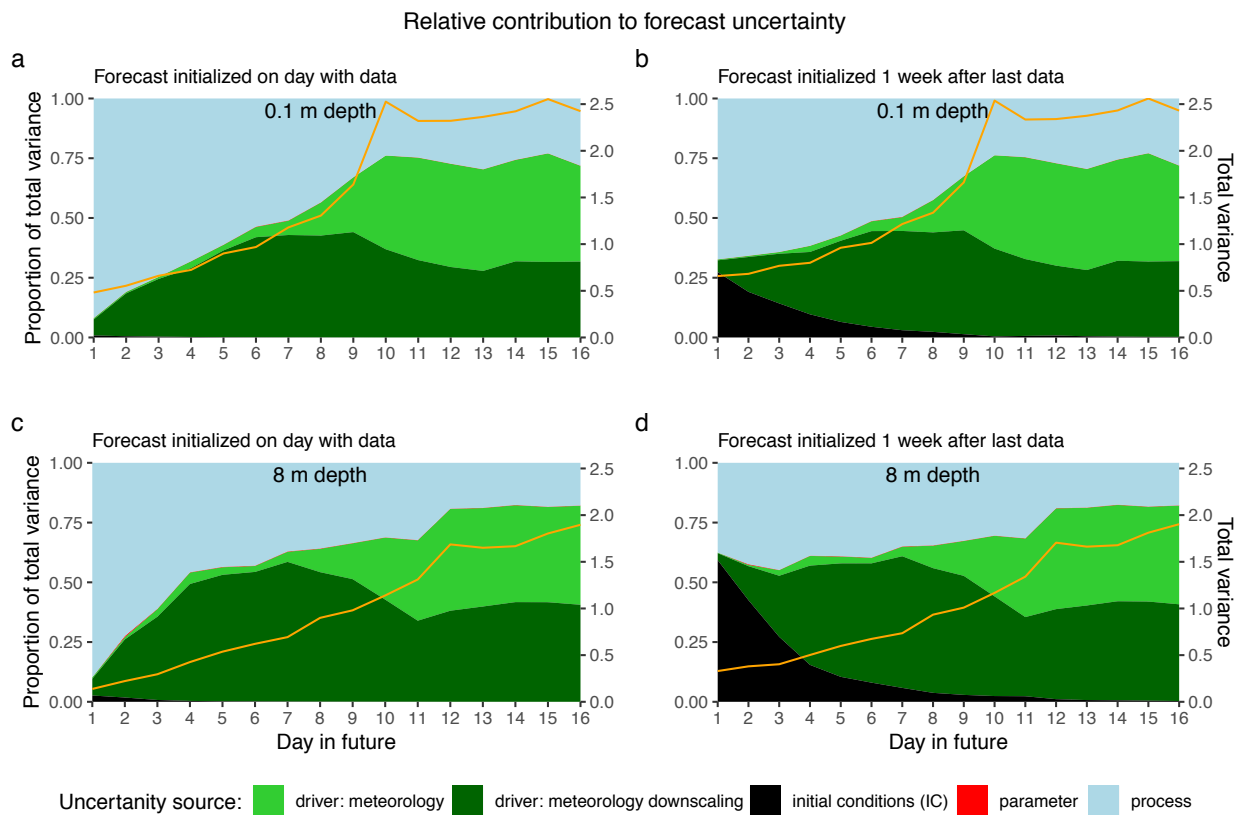

270

271

272

273

274

275 **Supporting Information Figure 4.** The relative contributions of the individual sources of  
 276 uncertainty (left axis) to the total forecast uncertainty (right axis, orange line) varies through the  
 277 16-day forecast horizon. This forecast was initialized on 1 December 2018 and is one of three  
 278 16-day forecasts (with Supporting Information Figure 2 and Supporting Information Figure 3)  
 279 that were averaged to create Figure 6. Two depths are shown (0.1 m – a, b; 8.0 m – c, d) and the  
 280 relative contributions of initial condition uncertainty without (left) and with (right) gaps in water  
 281 temperature sensor observations are shown in the two columns.

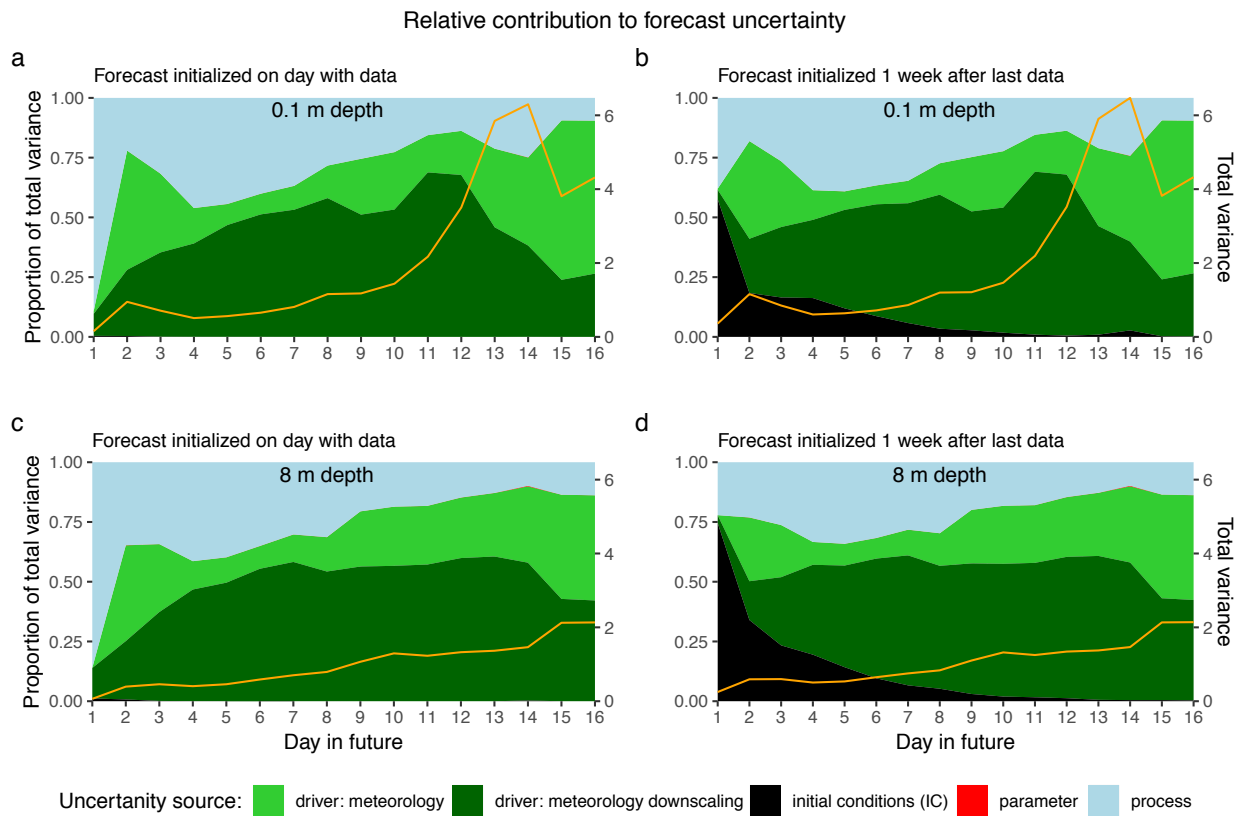

282

283

284

285
